# Supplementary material
Source: publisher figshare collection journal article supplement (https://future-science-group.figshare.com/ndownloader/files/31469744)
Supplement: Supplementary file 1 [file 31469744]

**Supplementary Table for recovery results**

Simultaneous estimation of ZY-19489 and its active metabolite, ZY-20486 in human plasma using LC-MS/MS; a novel anti-malarial compound

| **Extraction Method** | **Trial Details** | **% Recovery**  **(Comparison of response of extracted sample with neat sample)** | | |
| --- | --- | --- | --- | --- |
| **ZY-19489** | **ZY-20486** | **IS** |
| Liquid-Liquid Extraction (LLE) | Undiluted plasma extracted with ethyl acetate | 79 | 78 | 81 |
| Undiluted plasma extracted with ethyl acetate :Dichloromethane (80:20 %, v/v) | 79 | 77 | 83 |
| Undiluted plasma extracted with MTBE | 89 | 85 | 85 |
| Plasma diluted with 0.1% ammonia in water and extracted with ethyl acetate | 74 | 64 | 76 |
| Plasma diluted with 0.1% ammonia in water and extracted with ethyl acetate: dichloromethane (80:20 %, v/v) | 82 | 78 | 82 |
| Plasma diluted with 0.1% ammonia in water and extracted with MTBE | 84 | 80 | 86 |
| Solid Phase Extraction (SPE) | HLB cartridge, plasma diluted with 0.1% ammonia in water | 64 | 43 | 60 |
| MCX cartridge, plasma diluted with 0.1% formic acid in water | 125 | 103 | 81 |
